# Supplementary material
Source: Springer Nature journal article supplement (https://www.springermedizin.de/resource/supplementary/13041_2014_291_MOESM11_ESM.pdf/25657922)

A

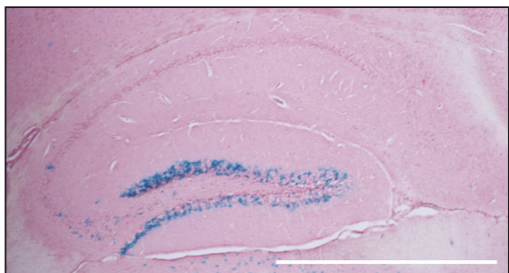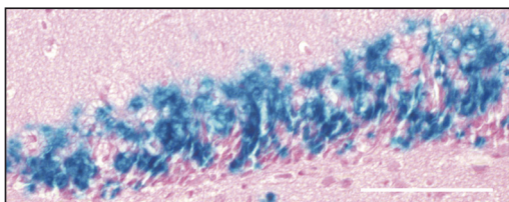

B

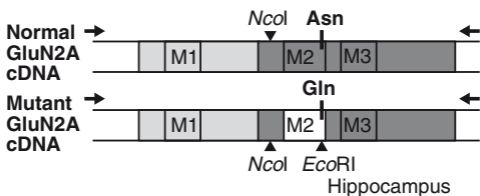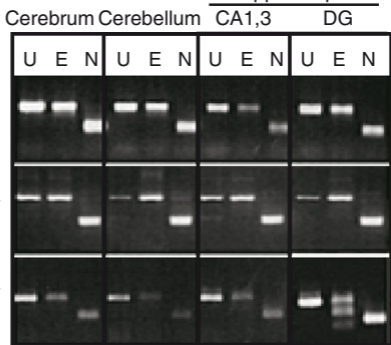

Supplement: MOESM11 [file 25657922]
